# Supplementary material
Source: Springer Nature journal article supplement (https://www.springermedizin.de/resource/supplementary/12889_2014_7042_MOESM5_ESM.pdf/9499600)

Men

Women

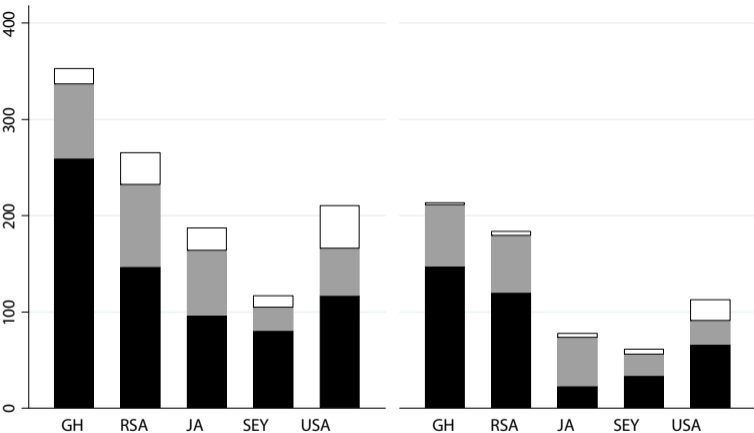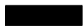

Occupation PA (min/d)

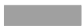

Travel PA (min/d)

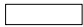

Recreation PA (min/d)

Supplement: MOESM5 [file 9499600]
